# Supplementary material for: Molnupiravir Real-World Utilization in COVID-19 Patients in the Czech Republic
Source: MDPI journal article supplement (doi:10.3390/jcm13082303), 2024-04-16
Supplement: s1 [file s1]

**Table S1.** Additional characteristics of patients treated with MOV in the Czech Republic, January 1, 2022 – April 30, 2022 (N=621)

| Patient characteristics                                                                                                                                              | N=621                                                                        |
|----------------------------------------------------------------------------------------------------------------------------------------------------------------------|------------------------------------------------------------------------------|
| <b>BMI (kg/m<sup>2</sup>)</b>                                                                                                                                        |                                                                              |
| N used                                                                                                                                                               | 621                                                                          |
| Median (Min; Max)                                                                                                                                                    | 28.70 (15.9; 65.8)                                                           |
| IQR                                                                                                                                                                  | 25.40; 33.60                                                                 |
| Mean (SD)                                                                                                                                                            | 30.18 (7.086)                                                                |
| <b>Type of test used for COVID-19 diagnosis</b>                                                                                                                      |                                                                              |
| RT-PCR                                                                                                                                                               | 489 (78.7%)                                                                  |
| Antigen test                                                                                                                                                         | 132 (21.3%)                                                                  |
| <b>COVID-19 variant</b>                                                                                                                                              |                                                                              |
| Omicron (All BA. 1 and 2)                                                                                                                                            | 84 (13.5%)                                                                   |
| Delta                                                                                                                                                                | 5 (0.8%)                                                                     |
| Unknown                                                                                                                                                              | 532 (85.7%)                                                                  |
| <b>Time from last vaccination to baseline positive test (months)</b>                                                                                                 |                                                                              |
| N used                                                                                                                                                               | 500                                                                          |
| Median (Min; Max)                                                                                                                                                    | 3.68 (0.2; 12.7)                                                             |
| IQR                                                                                                                                                                  | 2.53; 4.83                                                                   |
| Mean (SD)                                                                                                                                                            | 4.05 (2.268)                                                                 |
| Missing                                                                                                                                                              | 32                                                                           |
| <b>Type of vaccination</b>                                                                                                                                           |                                                                              |
| Comirnaty (Pfizer/BioNTech),<br>Spikevax (Moderna),<br>Vaxzevria (AstraZeneca),<br>Jcovden (Janssen Pharmaceutica),<br>Other or mixed vaccine application<br>Unknown | 361 (67.9%)<br>69 (13.0%)<br>21 (3.9%)<br>9 (1.7%)<br>52 (9.8%)<br>20 (3.8%) |
| <b>Type and number of vaccinations</b>                                                                                                                               |                                                                              |
| Comirnaty (Pfizer/BioNTech)                                                                                                                                          | N = 361                                                                      |
| 1                                                                                                                                                                    | 5 (1.4%)                                                                     |
| 2                                                                                                                                                                    | 68 (18.8%)                                                                   |
| 3                                                                                                                                                                    | 288 (79.8%)                                                                  |
| Spikevax (Moderna),                                                                                                                                                  | N = 69                                                                       |
| 1                                                                                                                                                                    | 1 (1.4%)                                                                     |
| 2                                                                                                                                                                    | 11 (15.9%)                                                                   |
| 3                                                                                                                                                                    | 57 (82.6%)                                                                   |
| Vaxzevria (AstraZeneca),                                                                                                                                             | N = 21                                                                       |
| 1                                                                                                                                                                    | 1 (4.8%)                                                                     |
| 2                                                                                                                                                                    | 20 (95.2%)                                                                   |
| Jcovden (Janssen Pharmaceutica)                                                                                                                                      | N = 9                                                                        |

|   |            |
|---|------------|
| 1 | 9 (100.0%) |
|---|------------|

**Table S2.** Prevalence of additional comorbidities among patients treated with MOV in the Czech Republic, January 1, 2022 – April 30, 2022 (N=621)

| Comorbidities                                  | N=621       |
|------------------------------------------------|-------------|
| Heart conditions                               | 92 (14.8%)  |
| Cancer                                         | 91 (14.7%)  |
| Asthma                                         | 78 (12.6%)  |
| Chronic lung diseases                          | 68 (11.0%)  |
| Chronic liver disease                          | 60 (9.7%)   |
| Neurological conditions including dementia     | 59 (9.5%)   |
| Chronic kidney disease                         | 57 (9.2%)   |
| Mental health disorders                        | 42 (6.8%)   |
| Cerebrovascular disease                        | 28 (4.5%)   |
| Primary thrombophilia                          | 24 (3.9%)   |
| Substance use                                  | 16 (2.6%)   |
| Obstructive and central sleep apnea            | 14 (2.3%)   |
| Immune deficiencies                            | 8 (1.3%)    |
| Solid organ or blood stem cell transplantation | 6 (1.0%)    |
| History of recurrent thromboembolic events     | 2 (0.3%)    |
| Sickle cell disease                            | 0           |
| Beta Thalassemia                               | 0           |
| Tuberculosis                                   | 0           |
| HIV                                            | 0           |
| <b>Number of comorbidities</b>                 |             |
| 0                                              | 36 (5.8%)   |
| 1                                              | 142 (22.9%) |
| 2                                              | 184 (29.6%) |
| 3                                              | 125 (20.1%) |
| 4                                              | 71 (11.4%)  |
| ≥ 5                                            | 63 (10.1%)  |

**Table S3.** Additional concomitant medications with a contraindication to or potential for major drug-drug interactions with nirmatrelvir/ritonavir among patients treated with MOV in the Czech Republic, January 1, 2022 – April 30, 2022 (N=621)

| Concomitant medications                          | N=621      |
|--------------------------------------------------|------------|
| Neuropsychiatric drugs                           | 93 (15.0%) |
| Inhaled and oral corticosteroids                 | 67 (10.8%) |
| Oral anticoagulants                              | 61 (9.8%)  |
| Corticosteroids and other immunosuppressive meds | 42 (6.8%)  |
| Antibiotics                                      | 34 (5.5%)  |

|                                                    |             |
|----------------------------------------------------|-------------|
| Antiarrhythmic agents                              | 32 (5.2%)   |
| Antineoplastics                                    | 19 (3.1%)   |
| Immunosuppressants                                 | 17 (2.7%)   |
| Anticonvulsants                                    | 9 (1.4%)    |
| <b>Number of different concomitant medications</b> |             |
| 0                                                  | 83 (13.4%)  |
| 1                                                  | 84 (13.5%)  |
| 2                                                  | 103 (16.6%) |
| 3                                                  | 118 (19.0%) |
| 4                                                  | 77 (12.4%)  |
| ≥ 5                                                | 156 (25.1%) |
